# Supplementary material for: What is the impact of restricted access policy on workplace violence in general hospital? A before-after study in a CHINESE tertiary hospital
Source: PubMed Central journal article supplement (PMC7549238; doi:10.1186/s12913-020-05757-7), 2020-10-12
Supplement: 12913_2020_5757_MOESM1_ESM.pdf [file 12913_2020_5757_MOESM1_ESM.pdf]

## Investigation on hospital workplace violence for medical workers

| <b>Part 1: Demographic</b>                                                                                                                                                                                                                                 |                                                                                                                                                                                                                                                                                                                                                                                                      |
|------------------------------------------------------------------------------------------------------------------------------------------------------------------------------------------------------------------------------------------------------------|------------------------------------------------------------------------------------------------------------------------------------------------------------------------------------------------------------------------------------------------------------------------------------------------------------------------------------------------------------------------------------------------------|
| <b>Gender:</b> <input type="checkbox"/> Male <input type="checkbox"/> Female                                                                                                                                                                               |                                                                                                                                                                                                                                                                                                                                                                                                      |
| <b>Age:</b>                                                                                                                                                                                                                                                |                                                                                                                                                                                                                                                                                                                                                                                                      |
| <b>Marriage status:</b> <input type="checkbox"/> Single <input type="checkbox"/> Married <input type="checkbox"/> Divorced <input type="checkbox"/> Widowed                                                                                                |                                                                                                                                                                                                                                                                                                                                                                                                      |
| <b>Ethnicity:</b>                                                                                                                                                                                                                                          |                                                                                                                                                                                                                                                                                                                                                                                                      |
| <b>Education background:</b><br><input type="checkbox"/> High school <input type="checkbox"/> Vocational school <input type="checkbox"/> Undergraduate <input type="checkbox"/> Master <input type="checkbox"/> PhD                                        |                                                                                                                                                                                                                                                                                                                                                                                                      |
| <b>Title:</b> <input type="checkbox"/> Senior title <input type="checkbox"/> Middle title <input type="checkbox"/> Junior title <input type="checkbox"/> No title                                                                                          |                                                                                                                                                                                                                                                                                                                                                                                                      |
| <b>Profession</b>                                                                                                                                                                                                                                          | <input type="checkbox"/> Doctor <input type="checkbox"/> Nurse <input type="checkbox"/> Medical technician                                                                                                                                                                                                                                                                                           |
| <b>Work place in last 12 months</b>                                                                                                                                                                                                                        | <input type="checkbox"/> Inpatient ward<br><input type="checkbox"/> Outpatient building<br><input type="checkbox"/> Other places                                                                                                                                                                                                                                                                     |
| <b>Department</b>                                                                                                                                                                                                                                          | <input type="checkbox"/> Internal medical<br><input type="checkbox"/> Surgery department<br><input type="checkbox"/> Obstetrics & Gynaecology<br><input type="checkbox"/> Emergency department<br><input type="checkbox"/> ICU<br><input type="checkbox"/> Paediatrics<br><input type="checkbox"/> Facial features<br><input type="checkbox"/> Medical technology<br><input type="checkbox"/> Others |
| <b>You have worked in this hospital since _____ (month, year)</b>                                                                                                                                                                                          |                                                                                                                                                                                                                                                                                                                                                                                                      |
| <b>Part 2: Physical violence</b>                                                                                                                                                                                                                           |                                                                                                                                                                                                                                                                                                                                                                                                      |
| <i>(physical force against another person or group, that results in physical, sexual or psychological harm. i.e. beating, kicking, slapping, stabbing, shooting, pushing, biting, and pinching)</i>                                                        |                                                                                                                                                                                                                                                                                                                                                                                                      |
| <b>Have you ever experienced physical violence in last 12 months?</b>                                                                                                                                                                                      |                                                                                                                                                                                                                                                                                                                                                                                                      |
| <input type="checkbox"/> Yes <input type="checkbox"/> No (jump to Part 3)                                                                                                                                                                                  |                                                                                                                                                                                                                                                                                                                                                                                                      |
| <b>Are you injured from of physical violence</b>                                                                                                                                                                                                           |                                                                                                                                                                                                                                                                                                                                                                                                      |
| <input type="checkbox"/> Yes <input type="checkbox"/> No                                                                                                                                                                                                   |                                                                                                                                                                                                                                                                                                                                                                                                      |
| <b>Part 3: Psychological violence</b>                                                                                                                                                                                                                      |                                                                                                                                                                                                                                                                                                                                                                                                      |
| <i>(intentional use of power, including threat of physical force, against another person or group, that can result in harm to physical, mental, spiritual, moral, or social development. i.e. verbal abuse, threatening events, and sexual harassment)</i> |                                                                                                                                                                                                                                                                                                                                                                                                      |
| <b>Have you ever experienced psychological violence in last 12 months?</b>                                                                                                                                                                                 |                                                                                                                                                                                                                                                                                                                                                                                                      |
| <input type="checkbox"/> Yes <input type="checkbox"/> No                                                                                                                                                                                                   |                                                                                                                                                                                                                                                                                                                                                                                                      |
