# Supplementary material for: What is the impact of restricted access policy on workplace violence in general hospital? A before-after study in a CHINESE tertiary hospital
Source: PubMed Central journal article supplement (PMC7549238; doi:10.1186/s12913-020-05757-7), 2020-10-12
Supplement: 12913_2020_5757_MOESM3_ESM.pdf [file 12913_2020_5757_MOESM3_ESM.pdf]

## Investigation on hospital workplace violence for security guards

|                                                                                                                                                                                                                                                                                                     |
|-----------------------------------------------------------------------------------------------------------------------------------------------------------------------------------------------------------------------------------------------------------------------------------------------------|
| <b>Part 1: Demographic</b>                                                                                                                                                                                                                                                                          |
| <b>Gender:</b>                                                                                                                                                                                                                                                                                      |
| <b>Age:</b>                                                                                                                                                                                                                                                                                         |
| <b>Marriage status:</b> <input type="checkbox"/> Single <input type="checkbox"/> Married <input type="checkbox"/> Divorced <input type="checkbox"/> Widowed                                                                                                                                         |
| <b>Ethnicity:</b>                                                                                                                                                                                                                                                                                   |
| <b>Education background:</b><br><input type="checkbox"/> High school <input type="checkbox"/> Vocational school <input type="checkbox"/> Undergraduate <input type="checkbox"/> Master <input type="checkbox"/> PhD                                                                                 |
| <b>Part 2: Physical violence</b><br><i>(physical force against another person or group, that results in physical, sexual or psychological harm. i.e. beating, kicking, slapping, stabbing, shooting, pushing, biting, and pinching)</i>                                                             |
| <b>Have you ever experienced physical violence in last 12 months?</b>                                                                                                                                                                                                                               |
| <input type="checkbox"/> Yes, frequency: _____ <input type="checkbox"/> No (jump to Part 3)                                                                                                                                                                                                         |
| <b>Reason of physical violence occurrence:</b> _____                                                                                                                                                                                                                                                |
| <b>Support you had after physical violence occurrence:</b>                                                                                                                                                                                                                                          |
| <input type="checkbox"/> Comfort form leader<br><input type="checkbox"/> Comfort from colleague<br><input type="checkbox"/> Time for rest<br><input type="checkbox"/> Comfort from family<br><input type="checkbox"/> Comfort from friends                                                          |
| <b>Part 3: Psychological violence</b><br><i>(intentional use of power; including threat of physical force, against another person or group, that can result in harm to physical, mental, spiritual, moral, or social development. i.e. verbal abuse, threatening events, and sexual harassment)</i> |
| <b>Have you ever experienced psychological violence in last 12 months?</b>                                                                                                                                                                                                                          |
| <input type="checkbox"/> Yes, frequency: _____ <input type="checkbox"/> No                                                                                                                                                                                                                          |
| <b>Reason of psychological violence occurrence:</b> _____                                                                                                                                                                                                                                           |
| <b>Support you had after psychological violence occurrence:</b>                                                                                                                                                                                                                                     |
| <input type="checkbox"/> Comfort form leader<br><input type="checkbox"/> Comfort from colleague<br><input type="checkbox"/> Time for rest<br><input type="checkbox"/> Comfort from family<br><input type="checkbox"/> Comfort from friends                                                          |
